# Supplementary material for: A view of the European carbon flux landscape through the lens of the ICOS atmospheric observation network
Source: Copernicus journal article supplement (doi:10.5194/acp-23-4993-2023), 2023-05-03
Supplement: Supplementary file 1 [file acp-23-4993-2023-supplement.zip]

Archive with 3 entries (3 files):
- acp-23-4993-2023-supplement-title-page.pdf
- S1_S2.pdf
- S3.xlsx
