# Supplementary material for: A view of the European carbon flux landscape through the lens of the ICOS atmospheric observation network
Source: Copernicus journal article supplement (doi:10.5194/acp-23-4993-2023), 2023-05-03
Supplement: Supplementary file 1 [file acp-23-4993-2023-supplement.zip › acp-23-4993-2023-supplement-title-page.pdf]

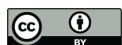

## *Supplement of*

# **A view of the European carbon flux landscape through the lens of the ICOS atmospheric observation network**

**Ida Storm et al.**

*Correspondence to:* Ida Storm ([ida.storm@nateko.lu.se](mailto:ida.storm@nateko.lu.se))

- [acp-23-4993-2023-supplement-title-page.pdf](#)
- [S1\\_S2.pdf](#)
- [S3.xlsx](#)

The copyright of individual parts of the supplement might differ from the article licence.
