# Supplementary material for: A view of the European carbon flux landscape through the lens of the ICOS atmospheric observation network
Source: Copernicus journal article supplement (doi:10.5194/acp-23-4993-2023), 2023-05-03
Supplement: Supplementary file 1 [file acp-23-4993-2023-supplement.zip › S1_S2.pdf]

# A view of the European carbon flux landscape through the lens of the ICOS atmospheric observation network

Correspondence to: Ida Storm (ida.storm@nateko.lu.se)

| STILT station | Sampling height | r (all hours) | r (12, 15 CET) | Bias (all hours) | Bias (12, 15 CET) | RMSE (all hours) | RMSE (12, 15 CET) |
|---------------|-----------------|---------------|----------------|------------------|-------------------|------------------|-------------------|
| BIR075        | 75              | 0.88          | 0.92           | -2.66            | -1.84             | 4.32             | 3.69              |
| CMN760        | 8               | 0.88          | 0.90           | -0.72            | -0.20             | 3.53             | 3.54              |
| GAT344        | 341             | 0.88          | 0.89           | -1.52            | -1.36             | 4.56             | 4.43              |
| HEL110        | 110             | 0.91          | 0.92           | -4.39            | -4.25             | 7.01             | 6.77              |
| HPB131        | 131             | 0.77          | 0.79           | -2.03            | -1.39             | 6.24             | 6.01              |
| HTM150        | 150             | 0.90          | 0.93           | -2.10            | -1.07             | 4.36             | 3.49              |
| IPR100        | 100             | 0.70          | 0.85           | -10.45           | -3.89             | 15.46            | 8.97              |
| JFJ           | 5               | 0.81          | 0.81           | -1.21            | -1.23             | 4.10             | 4.24              |
| JUE120        | 120             | 0.57          | 0.72           | 0.82             | 3.64              | 12.77            | 11.62             |
| KIT200        | 200             | 0.68          | 0.82           | -7.05            | -4.28             | 13.22            | 9.97              |
| KRE125        | 125             | 0.79          | 0.86           | -3.25            | -1.48             | 6.60             | 4.94              |
| LIN099        | 98              | 0.71          | 0.86           | -3.22            | -1.50             | 8.82             | 5.33              |
| LMP           | 8               | 0.92          | 0.92           | -0.76            | -0.63             | 2.25             | 2.21              |
| NOR100        | 100             | 0.84          | 0.92           | -3.15            | -1.27             | 5.65             | 3.73              |
| OPE120        | 120             | 0.82          | 0.87           | -1.93            | -0.90             | 4.97             | 3.89              |
| OXK163        | 163             | 0.77          | 0.75           | -1.10            | -1.03             | 5.49             | 6.12              |
| PAL           | 12              | 0.89          | 0.95           | -0.69            | -0.71             | 3.53             | 2.82              |
| PRS           | 10              | 0.84          | 0.87           | -0.60            | -0.18             | 3.41             | 2.79              |
| PUI084        | 84              | 0.89          | 0.95           | -2.27            | -0.91             | 4.64             | 3.26              |
| PUY           | 10              | 0.83          | 0.86           | -0.88            | 0.25              | 3.44             | 3.06              |
| SAC100        | 100             | 0.64          | 0.83           | -1.60            | 0.20              | 9.90             | 6.26              |
| SMR125        | 125             | 0.92          | 0.95           | -2.21            | -1.15             | 4.13             | 3.14              |
| STE252        | 252             | 0.84          | 0.88           | -2.85            | -2.12             | 6.34             | 5.53              |
| SVB150        | 150             | 0.92          | 0.95           | -2.07            | -1.37             | 3.77             | 3.11              |
| TOH147        | 147             | 0.83          | 0.83           | 0.17             | 0.01              | 4.72             | 4.82              |
| TRN180        | 180             | 0.79          | 0.86           | -1.98            | -0.88             | 5.01             | 3.83              |
| UTO           | 57              | 0.91          | 0.90           | -1.65            | -1.75             | 3.71             | 3.85              |
| WAO           | 10              | 0.70          | 0.60           | -3.03            | -3.31             | 8.30             | 10.66             |
| ZSF           | 3               | 0.87          | 0.88           | -0.90            | -0.69             | 3.65             | 3.55              |

**Table S1. Agreement between modelled and measured CO<sub>2</sub> concentrations at stations in the current (November 2022, limited to stations within the model domain) ICOS network year 2020. Results given all hours with model results (0:00, 3:00, 6:00, 9:00, 12:00, 15:00, 18:00 and 21:00 CET) and only afternoon hours (12:00 and 15:00 CET) are presented. A negative bias means model underestimation.**

| STILT id | Name          | Sampling height | Country | Latitude | Longitude |
|----------|---------------|-----------------|---------|----------|-----------|
| ARN100*  | El Arenosillo |                 | Spain   | 37.1     | -6.73     |
| BIK300*  | Bialystok     |                 | Poland  | 53.23    | 23.03     |
| BIR075   | Birkenes      | 75              | Norway  | 58.38    | 8.25      |

|         |                                         |     |             |       |        |
|---------|-----------------------------------------|-----|-------------|-------|--------|
| CMN760  | Monte Cimone                            | 8   | Italy       | 44.19 | 10.7   |
| EST110* | SMEAR Estonia                           |     | Estonia     | 58.27 | 27.27  |
| FKL015* | Finokalia                               |     | Greece      | 35.34 | 25.67  |
| GAT344  | Gartow                                  | 341 | Germany     | 53.07 | 11.44  |
| HAC*    | Helmos                                  |     | Greece      | 37.98 | 22.2   |
| HEL110  | Helgoland                               | 110 | Germany     | 54.18 | 7.9    |
| HPB131  | Hohenpeissenberg                        | 131 | Germany     | 47.8  | 11.01  |
| HTM150  | Hyltemossa                              | 150 | Sweden      | 56.1  | 13.42  |
| HUN115* | Hegyhátsál                              |     | Hungary     | 46.95 | 16.65  |
| IPR100  | Ispra                                   | 100 | Italy       | 45.81 | 8.63   |
| JFJ     | Jungfrauoch                             | 5   | Switzerland | 46.55 | 7.98   |
| JUE120  | Jülich                                  | 120 | Germany     | 50.91 | 6.41   |
| KAS*    | Kasprowy Wierch                         |     | Poland      | 49.25 | 19.98  |
| KIT200  | Karlsruhe                               | 200 | Germany     | 49.09 | 8.43   |
| KRE250  | Křešín u Pacova                         | 250 | Czechia     | 49.57 | 15.08  |
| LAH032* | Lahemaa                                 |     | Estonia     | 59.5  | 25.9   |
| LIN099  | Lindenberg                              | 98  | Germany     | 52.21 | 14.12  |
| LMP     | Lampedusa                               | 8   | Italy       | 35.52 | 12.63  |
| LMU080* | La Muela                                |     | Spain       | 41.6  | -1.1   |
| LUT     | Lutjewad                                | 60  | Netherlands | 53.4  | 6.35   |
| MAH*    | Malin Head                              |     | Ireland     | 55.37 | -7.34  |
| MAJ100* | Majadas de Tiétar                       |     | Spain       | 39.95 | -5.79  |
| MHD*    | Mace Head                               |     | Ireland     | 53.33 | -9.9   |
| NOR100  | Norunda                                 | 100 | Sweden      | 60.09 | 17.48  |
| OPE120  | Observatoire pérenne de l'environnement | 120 | France      | 48.55 | 5.5    |
| OXK163  | Ochsenkopf                              | 163 | Germany     | 50.05 | 11.82  |
| PAL     | Pallas-Sammaltunturi                    | 12  | Finland     | 67.97 | 24.12  |
| PCW150* | Poland Central West                     |     | Poland      | 52.29 | 18.62  |
| PRS     | Plateau Rosa                            | 10  | Italy       | 45.94 | 7.71   |
| PSE150* | Poland South East                       |     | Poland      | 50.71 | 20.77  |
| PUI084  | Puijo                                   | 84  | Finland     | 62.91 | 27.66  |
| PUY     | Puy de Dôme                             | 10  | France      | 45.77 | 2.97   |
| RGL090* | Ridge Hill                              | 90  | UK          | 52.0  | -2.54  |
| SAC100  | Saclay                                  | 100 | France      | 48.72 | 2.14   |
| SMR125  | Hyytiälä                                | 125 | Finland     | 61.85 | 24.29  |
| SNZ*    | Sniezka mountain                        |     | Poland      | 50.74 | 15.74  |
| SSL*    | Schauinsland                            | 12  | Germany     | 47.91 | 7.91   |
| STE252  | Steinkimmen                             | 252 | Germany     | 53.04 | 8.46   |
| SVB150  | Svartberget                             | 150 | Sweden      | 64.26 | 19.77  |
| TOH147  | Torfhaus                                | 147 | Germany     | 51.8  | 10.53  |
| TRN180  | Trainou                                 | 180 | France      | 47.96 | 2.11   |
| UTO     | Utö - Baltic sea                        | 57  | Finland     | 59.78 | 21.38  |
| VSD006* | Vilsandi                                |     | Estonia     | 58.38 | 21.82  |
| VTO014* | Valenia                                 |     | Ireland     | 51.94 | -10.25 |
| WAO     | Weybourne                               | 10  | UK          | 52.95 | 1.12   |
| WES     | Westerland                              | 14  | Germany     | 54.92 | 8.3    |

|     |           |   |         |       |       |
|-----|-----------|---|---------|-------|-------|
| ZSF | Zugspitze | 3 | Germany | 47.42 | 10.98 |
|-----|-----------|---|---------|-------|-------|

**Table S2. Information about stations in the current (November 2022, limited to stations within the model domain) and extended (\*) ICOS network. Sampling height is only provided for stations in the current network.**

See separate Excel-file for Table S3. Table S3 is a supplement to Table 1 with information on respiration and total CO<sub>2</sub> signals at the stations.
