# Supplementary material for: A view of the European carbon flux landscape through the lens of the ICOS atmospheric observation network
Source: Copernicus journal article supplement (doi:10.5194/acp-23-4993-2023), 2023-05-03
Supplement: Supplementary file 1 [file acp-23-4993-2023-supplement.zip › S3.xlsx]

## Sheet: signals_table_full
Station	Crop (GEE)	Coniferous forest (GEE)	Mixed forest (GEE)	Pasture (GEE)	Broadleaf forest (GEE)	Urban (GEE)	Grass & shrub (GEE)	Other land cover (GEE)	Ocean (land cover) (GEE)	Unknown (land cover) (GEE)	Respiration	Ocean	Energy	Transport	Industry	Residential	Other categories	Total CO2 signal
ARN100*	-0.733911	-0.272606	-0.888028	-0.462513	-0.423941	-0.238599	-0.234223	-0.029432	-0.177165	-1.26077e-09	4.36172	-0.00630806	0.353616	0.359814	0.229267	0.0508139	0.00230145	1.8908
BIK300*	-4.41306	-2.21583	-1.59225	-1.71047	-1.12598	-0.683017	-1.18596	-0.107673	-0.0949311	-3.63447e-08	5.05622	-0.0310507	0.459988	0.306948	0.203702	0.0905855	0.0116778	-7.03111
BIR075	-1.20009	-4.14915	-0.728242	-0.502357	-0.287713	-0.245787	-0.499778	-0.153927	-0.270049	-8.00596e-08	4.09768	-0.124931	0.558398	0.288756	0.191634	0.0552515	0.00430885	-2.966
CMN760	-2.27872	-1.12333	-1.56494	-1.35745	-3.77754	-0.843268	-0.726288	-0.100038	-0.165296	-1.06164e-09	4.86728	-0.00538699	0.392334	0.429591	0.281246	0.110147	0.00600753	-5.85566
EST110*	-2.58078	-2.72786	-3.20635	-0.775464	-1.55568	-0.324348	-1.47392	-0.280355	-0.210851	-3.80831e-08	5.55075	-0.0678993	0.427848	0.170404	0.14732	0.0471016	0.00530989	-6.85477
FKL015*	-2.72449	-0.700875	-0.902685	-1.11352	-1.53197	-0.440649	-0.631055	-0.0656994	-0.175996	-2.78784e-08	4.76383	0.130379	0.524425	0.378552	0.296134	0.0974767	0.0124551	-2.08368
GAT344	-3.62798	-1.73346	-1.02498	-1.28	-0.487067	-0.761987	-0.47439	-0.109068	-0.239673	-2.18894e-08	4.1605	-0.0693092	0.688085	0.454349	0.39276	0.155807	0.00936251	-3.94706
HAC*	-3.01037	-0.970171	-1.31181	-1.82345	-2.22209	-0.538005	-0.870181	-0.0811164	-0.191766	-2.36371e-09	5.09484	0.00816653	0.368876	0.280467	0.217121	0.0738855	0.00980638	-4.96579
HEL110	-2.2729	-0.99268	-0.766059	-1.14351	-0.336408	-0.479048	-0.362231	-0.113747	-0.384559	-2.18892e-08	3.05271	-0.0861463	0.648248	0.388607	0.269457	0.1242	0.00645297	-2.4476
HPB131	-2.80312	-1.65702	-2.78547	-4.26723	-0.933714	-1.58381	-0.450315	-0.188172	-0.0762583	-1.26664e-11	6.50844	-0.0336576	0.502609	0.694104	0.413137	0.232003	0.00849438	-6.41998
HTM150	-2.70714	-2.53119	-1.46411	-0.668749	-0.770258	-0.435852	-0.485005	-0.144755	-0.36166	-3.34147e-08	4.00628	-0.103806	0.463136	0.321287	0.229567	0.07024	0.00764822	-4.57436
HUN115*	-6.02054	-1.94665	-3.11135	-1.59136	-2.30336	-1.57608	-1.06643	-0.100238	-0.101828	-4.24176e-09	8.00119	-0.026541	0.666873	0.684493	0.471553	0.182902	0.0211158	-7.81624
IPR100	-3.73565	-1.39457	-2.0198	-1.95182	-4.15028	-2.43193	-0.705157	-0.917679	-0.0904997	-6.20344e-10	9.42841	-0.0139701	0.849043	1.60781	1.73705	0.546919	0.00851653	-3.23361
JFJ	-1.80698	-1.09895	-1.94751	-1.85889	-0.908696	-0.876353	-0.468191	-0.20749	-0.0627706	-2.65423e-09	3.97451	-0.0231652	0.255565	0.375053	0.227703	0.119782	0.00470174	-4.30169
JUE120	-2.96792	-0.837026	-1.11571	-1.32837	-0.525959	-1.44872	-0.242758	-0.0908143	-0.157439	-7.64696e-09	4.71342	-0.0701771	5.59509	1.14586	1.32725	0.461408	0.00952848	4.46767
KAS*	-4.05334	-2.25052	-1.83113	-2.04456	-1.61368	-1.17634	-0.933385	-0.0957638	-0.078191	-1.87765e-08	5.1971	-0.0210747	0.613213	0.365476	0.322963	0.115325	0.0131655	-7.47073
KIT200	-3.42876	-1.05718	-1.77308	-1.25434	-1.23536	-1.31117	-0.323813	-0.0519725	-0.0957015	-7.18664e-10	5.71591	-0.0485387	1.62926	0.828455	0.66732	0.328767	0.0103711	-1.39985
KRE250	-4.94111	-2.24911	-1.56622	-1.55989	-0.82098	-1.09598	-0.513112	-0.0764724	-0.093828	-5.88564e-09	5.36311	-0.0381658	0.741392	0.530007	0.407974	0.159819	0.0167121	-5.73586
LAH032*	-1.89525	-4.55218	-2.74602	-0.664397	-0.915476	-0.33879	-1.12955	-0.24514	-0.748469	-9.71868e-08	6.47313	-0.107177	0.712006	0.229772	0.381896	0.0649805	0.00507959	-5.47558
LIN099	-3.7058	-2.49728	-1.21729	-1.21144	-0.617984	-0.871353	-0.618406	-0.1378	-0.175954	-2.63987e-08	5.94075	-0.0642506	1.52571	0.617831	0.713059	0.237196	0.014511	-2.0685
LMP	-1.62627	-0.602142	-0.927426	-0.846854	-1.03203	-0.438109	-0.464653	-0.0464578	-0.127876	-2.44249e-09	3.02336	0.258841	0.331865	0.402827	0.199948	0.0711537	0.00479771	-1.81902
LMU080*	-1.40466	-0.512833	-1.20305	-0.683049	-1.06951	-0.285977	-0.283733	-0.0335799	-0.150519	-6.85603e-10	4.92415	-0.0258368	0.304771	0.359771	0.246695	0.0719289	0.00432594	0.258893
LUT	-3.11114	-0.94996	-0.778959	-1.57574	-0.345162	-0.658234	-0.366553	-0.221478	-0.815575	-2.56407e-08	4.28569	-0.0896066	1.34776	0.58454	0.415973	0.200603	0.00812095	-2.06972
MAH*	-0.872274	-0.623034	-0.504018	-1.39361	-0.163073	-0.215985	-0.282728	-0.0835205	-0.666738	-3.74696e-08	2.2997	-0.234212	0.245423	0.250144	0.123262	0.0565281	0.00370896	-2.06042
MAJ100*	-0.698012	-0.369497	-1.15197	-0.723382	-0.430632	-0.238184	-0.288701	-0.0226739	-0.106138	-7.38565e-09	5.48599	-0.0217878	0.11874	0.229194	0.142564	0.0395027	0.00231542	1.96732
MHD*	-0.702152	-0.414617	-0.321306	-1.08336	-0.0949416	-0.15847	-0.426296	-0.147088	-0.52392	-7.85587e-09	2.09716	-0.163865	0.166512	0.194535	0.0876089	0.0472056	0.00283856	-1.44016
NOR100	-1.72173	-5.09333	-1.52697	-0.353658	-0.250435	-0.225151	-0.482435	-0.305564	-0.198162	-8.40961e-08	5.01257	-0.115042	0.392015	0.209198	0.239915	0.0402887	0.00320728	-4.37528
OPE120	-3.19731	-0.673361	-0.95857	-0.986144	-1.17538	-0.695927	-0.231415	-0.0540868	-0.102558	-1.2605e-09	4.59057	-0.0544852	0.451749	0.475616	0.355178	0.136353	0.00932487	-2.11044
OXK163	-3.55142	-2.04957	-1.48948	-1.51972	-0.781612	-1.17872	-0.389784	-0.0591089	-0.0949178	-3.25461e-08	5.28775	-0.0454576	0.781605	0.609581	0.411148	0.19931	0.0113303	-3.85906
PAL	-0.367862	-4.4886	-0.581806	-0.137165	-0.123995	-0.0733732	-1.43327	-0.218483	-0.100431	-8.47134e-08	6.14297	-0.101289	0.0935168	0.0645624	0.0506428	0.0139142	0.000933331	-1.25974
PCW150*	-5.0191	-2.0528	-1.36418	-1.5454	-0.813451	-0.85449	-0.909853	-0.117879	-0.1239	-3.746e-08	5.8524	-0.042612	0.956085	0.431561	0.303339	0.146731	0.018766	-5.13478
PRS	-1.53878	-1.09905	-1.56838	-1.7701	-0.957843	-0.750492	-0.361655	-0.270677	-0.0586925	-7.07053e-10	3.86432	-0.0183731	0.236792	0.342353	0.203259	0.103319	0.0041739	-3.63983
PSE150*	-5.09581	-2.46545	-1.83753	-1.90638	-1.37972	-1.38331	-1.19323	-0.0913533	-0.0809549	-2.93626e-08	6.59634	-0.0323421	0.881173	0.469273	0.588753	0.16056	0.0192449	-6.75074
PUI084	-0.863287	-5.05842	-1.9765	-0.206256	-0.260864	-0.150925	-0.525804	-0.564371	-0.127542	-6.2777e-08	4.77803	-0.0741927	0.525499	0.123393	0.108696	0.0430191	0.00172911	-4.22779
PUY	-1.54708	-0.649416	-1.53053	-1.7398	-1.09119	-0.412358	-0.286322	-0.0352397	-0.10167	-3.31575e-09	3.62232	-0.0348104	0.195659	0.274402	0.174695	0.0690481	0.00553939	-3.08675
RGL090*	-2.13205	-0.560257	-0.741419	-1.84639	-0.173455	-0.548033	-0.269105	-0.0653986	-0.24682	-5.88592e-09	3.34541	-0.118492	0.598774	0.603268	0.30993	0.177662	0.00678898	-1.65959
SAC100	-2.49207	-0.498712	-0.643055	-0.948266	-0.65888	-0.682679	-0.208296	-0.0452099	-0.16022	-5.06097e-09	4.24523	-0.0746083	0.480015	1.07284	1.03864	0.450404	0.0100788	0.88521
SMR125	-1.23436	-5.57152	-1.61786	-0.252032	-0.307748	-0.19325	-0.521719	-0.416562	-0.182459	-6.52964e-08	4.82735	-0.094318	0.339266	0.159148	0.173862	0.0460366	0.00225291	-4.84392
SNZ*	-3.92272	-2.10302	-1.44429	-1.4291	-0.773277	-0.909274	-0.603293	-0.0867831	-0.116489	-1.70293e-08	4.4994	-0.0431928	0.725247	0.426392	0.332817	0.135387	0.0129191	-5.29928
SSL*	-3.10317	-1.33024	-2.03629	-1.507	-1.34704	-1.34472	-0.312759	-0.0615779	-0.0881658	-3.93587e-09	4.97354	-0.039869	0.458081	0.578067	0.396582	0.192981	0.00786855	-4.56372
STE252	-3.56059	-1.07677	-0.899999	-1.70852	-0.4201	-0.968667	-0.390791	-0.108219	-0.273434	-2.09716e-08	4.10443	-0.0746345	0.980761	0.563932	0.523904	0.219717	0.00904714	-3.07994
SVB150	-0.64023	-5.92374	-0.937942	-0.217606	-0.18461	-0.117656	-0.751012	-0.241168	-0.146046	-3.69934e-08	4.78637	-0.10423	0.155366	0.101163	0.0840356	0.0210901	0.00147121	-4.11475
TOH147	-3.56671	-1.89649	-1.1336	-1.23743	-0.795836	-1.03104	-0.370968	-0.0719997	-0.136855	-1.03724e-08	4.92786	-0.0590523	0.874198	0.6276	0.629125	0.211723	0.00988259	-3.01959
TRN180	-2.65666	-0.483145	-0.724234	-0.904146	-0.773362	-0.616228	-0.218038	-0.0417243	-0.145757	-3.31923e-09	4.04961	-0.0620245	0.278133	0.492902	0.322228	0.158395	0.00916613	-1.31488
UTO	-1.30548	-2.96305	-1.3166	-0.387727	-0.429515	-0.207593	-0.552934	-0.191294	-0.289741	-8.70606e-08	3.24145	-0.235978	0.498672	0.185427	0.237564	0.0376385	0.00318829	-3.67597
VSD006*	-1.67589	-2.76233	-1.83882	-0.573221	-0.693978	-0.268096	-0.806471	-0.181875	-1.11345	-4.51442e-08	4.9126	-0.289514	0.386265	0.241443	0.187806	0.0483629	0.00541386	-4.42175
VTO014*	-0.602293	-0.344829	-0.315819	-1.00597	-0.0878661	-0.168588	-0.257126	-0.0609995	-0.612415	-2.6588e-09	2.10854	-0.170259	0.189694	0.199166	0.0886036	0.0518496	0.00250286	-0.985808
WAO	-4.07901	-0.748647	-0.753605	-1.18358	-0.231827	-0.635772	-0.352839	-0.16503	-1.04165	-2.99821e-08	4.98467	-0.089962	0.822467	0.81637	0.395466	0.18258	0.0134191	-2.06695
WES	-2.30323	-1.04241	-0.781952	-0.99331	-0.312452	-0.436813	-0.396011	-0.122164	-1.30881	-5.99543e-08	3.89024	-0.0926494	0.97197	0.467629	0.224386	0.115037	0.0083359	-2.1122
ZSF	-2.18908	-1.75029	-2.06756	-2.36551	-0.922178	-1.09808	-0.519752	-0.179079	-0.0712394	-2.52574e-11	4.67747	-0.0267105	0.341863	0.474561	0.302679	0.146736	0.00585443	-5.24032
Average	-2.55377	-1.8623	-1.37074	-1.232	-0.892522	-0.692946	-0.557034	-0.15216	-0.265321	-2.47959e-08	4.75531	-0.0634715	0.662113	0.44977	0.360548	0.138394	0.00792147	-3.26821
Std	1.34041	1.46633	0.660564	0.695715	0.807435	0.485176	0.315952	0.149622	0.285378	2.69439e-08	1.31494	0.0806452	0.779589	0.280115	0.302895	0.111239	0.00792147	2.49241
Table S3: Summertime (JJA) average land cover GEE, anthropogenic, and ocean signals (in ppm) at the stations in the current (November 2022) and extended (*) ICOS atmospheric network,
limited to stations within the model domain. For each category, the values of the five stations with highest signals are in bold. See Table S2 for more information about the stations and Table S3 for respiration and total CO2 signals.
